# Supplementary material for: Radiological Perspectives in Congenital Sensorineural Hearing Loss: Insights from Cochlear Implant Candidates
Source: Preprints.org preprint supplement (doi:10.20944/preprints202411.0530.v1), 2024-11-08
Supplement: Supplementary file 1 [file supplementary]

**Table 1:**

|  | | | | **INNER EAR** | | | | | | **CN and IAC** | |
| --- | --- | --- | --- | --- | --- | --- | --- | --- | --- | --- | --- |
| **Cochlear structure** | **Vestibule morphology** | **SCC morphology** | **Cochlear height** | **LSCC width** | **Vestibular aqueduct (N: <1,5 mm)** | **Cochlear nerve diameter** | **IAC diameter (N: >2 mm)** |
| **Case No** | **Age** | **Gender** | **Side** |
| 1 | 2 | M | R | N | BL LCVD | BL LCVD | R: 4.8 L: 4.8 | - | N | N | N |
| 2 | 12 | F | R | N | N | BL LSCC hypoplastic | R: 4.6 L: 5.0 | R: 2.5 L: 2.1 | N | N | N |
| 3 | 1 | M | R | N | BL LCVD | BL LCVD | R: 4.7 L: 4.5 | - | N | N | N |
| 4 | 2 | F | L | BL CH | BL hypoplastic | BL aplastic | R: 3.3 L: 3.4 | - | N | BL hypoplastic | N |
| 5 | 1 | M | R | N | N | N | R: 5.0 L: 5.1 | R: 3.1 L: 3.5 | N | BL hypoplastic | N |
| 6 | 4 | F | BL | BL CH | BL bud-shaped | BL PSCC hypoplastic, others absent | - | - | N | - | BL stenosis |
| 7 | 2 | M | R | R: CH | N | R LSCC hypoplastic | R: 5.0 L: 4.9 | R: 1.9 L: 3.0 | N | N | N |
| L: N |
| 8 | 2 | M | R | BL IP-1 | BL enlarged | BL LSCC hypoplastic | - | R: 2.5 L: 1.3 | N | BL hypoplastic | N |
| 9 | 2 | M | L | BL CH | BL LSCC and PSCC formed a common cavity with a vestibule | BL LSCC and PSCC formed a common cavity with a vestibule | R: 3.5 L: 3.6 | - | N | N | N |
| 10 | 3 | F | R | BL CH | BL hypoplastic | BL aplastic | R: 3.9 R: 4.0 | - | N | BL hypoplastic | N |
| 11 | 2 | F | L | BL CH | BL hypoplastic | BL aplastic | R: 4.2 L: 3.7 | - | N | BL hypoplastic | BL stenosis |
| 12 | 2 | F | BL | N | BL LSCC and PSCC formed a common cavity with a vestibule | BL LSCC and PSCC formed a common cavity with a vestibule | R: 3.0 L: 3.7 | - | N | N | N |
| 13 | 5 | M | BL | R: IP-2 | N | N | R: 4.4 L: 4.5 | R: 3.3 L: 3.0 | N | N | N |
| L: N |
| 14 | 1 | F | R | BL IP-2 | N | N | R: 4.2 L: 4.0 | R: 2.8 L: 3.2 | N | N | N |

|  | | | | **INNER EAR** | | | | | | **CN and IAC** | |
| --- | --- | --- | --- | --- | --- | --- | --- | --- | --- | --- | --- |
| **Cochlear structure** | **Vestibule morphology** | **SCC morphology** | **Cochlear height** | **LSCC width** | **Vestibular aqueduct (N: <1,5 mm)** | **Cochlear nerve diameter** | **IAC diameter (N: >2 mm)** |
| **Case No** | **Age** | **Gender** | **Side** |
| 15 | 4 | M | R | BL IP2 | N | N | R: 4.9 L: 4.8 | R: 3.8 L: 3.6 | BL enlarged | R: hypoplastic | N |
| 16 | 32 | F | R | BL CH | N | N | R: 4.4 L: 4.4 | R: 3.4 L: 3.8 | N | N | N |
| 17 | 9 | F | R | BL CH | R: LSCC fused with vestibule / L: N | R: LSCC fused with vestibule / L: LSCC hypoplastic | R: 3.1 L: 3.6 | R: - L: 1.2 mm | N | N | N |
| 18 | 5 | M | L | BL IP-2 | BL LSCC and vestibule formed a common cavity | BL LSCC and vestibule formed a common cavity | R: 4.2 L: 4.8 | - | N | R: hypoplastic | N |
| 19 | 12 | M | R | BL CH | R: enlarged / L: N | R: LSCC hypoplastic | R: 4.1 L: 4.1 | R: 0.8 L: 3.0 | N | N | N |
| L: N |
| 20 | 3 | F | L | BL CH | BL vestibule and SCCs formed a common cavity | BL vestibule and SCCs formed a common cavity | R: 3.1 L: 3.3 | - | N | R: hypoplastic | N |
| L: aplastic |
| 21 | 17 | M | L | BL CH | N | BL PSCC hypoplastic | R: 4.2 L: 4.6 | R: 5.1 L: 5.0 | R: enlarged | BL hypoplastic | R: N |
| L: N | L: stenosis |
| 22 | 2 | M | BL | BL IP3 | N | N | R: 3.8 L: 4.0 | R: 4.0 L: 4.5 | N | BL hypoplastic | N |
| 23 | 2 | F | R | R: IP-1 | R: hypoplastic / L: absent | R: hypoplastic (single bud) | - | - | R: N | R: N | R: N |
| L: absent | L: absent | L: absent | L: aplastic | L: absent |
| 24 | 2 | M | R | BL IP-1 | BL vestibule and LSCC formed a common cavity | BL vestibule and LSCC formed a common cavity / BL SSCC and PSCC enlarged | - | - | N | N | N |
| 25 | 4 | M | L | BL CH | N | N | R: 4.9 L: 4.5 | R: 3.2 L: 2.9 | N | N | N |
| 26 | 4 | M | R | BL IP-3 | N | N | R: 4.1 L: 4.0 | R: 4.5 L: 4.5 | N | N | N |
| 27 | 22 | F | R | N | N | BL LSCC hypoplastic | R: 4.7 L: 4.9 | R: 1.9 L: 2.1 | N | N | N |
| 28 | 2 | M | BL | BL CH | BL vestibule and SCCs formed a common cavity | BL vestibule and SCCs formed a common cavity | R: 3.5 L: 3.7 | - | N | N | N |
| 29 | 2 | F | R | BL IP-2 | N | N | R: 3.5 L: 3.5 | R: 3.5 L: 3.4 | N | N | N |

**Table 2:**

| RIGHT | LEFT | | | | | | | | |
| --- | --- | --- | --- | --- | --- | --- | --- | --- | --- |
|  | LA | IP-1 | IP-2 | IP-3 | CH | LCVD | LSCCH | N |
| LA | 0 | 0 | 0 | 0 | 0 | 0 | 0 | 0 |
| IP-1 | 1 | 2 | 0 | 0 | 0 | 0 | 0 | 0 |
| IP-2 | 0 | 0 | 4 | 0 | 0 | 0 | 0 | 1 |
| IP-3 | 0 | 0 | 0 | 2 | 0 | 0 | 0 | 0 |
| CH | 0 | 0 | 0 | 0 | 12 | 0 | 0 | 1 |
| LCVD | 0 | 0 | 0 | 0 | 0 | 3 | 0 | 0 |
| LSCCH | 0 | 0 | 0 | 0 | 0 | 0 | 3 | 0 |
| N | 0 | 0 | 0 | 0 | 0 | 0 | 0 | 0 |

**Table 3:**

| **Case No** | **Age** | **Gender** | **Intracranial pathology** | **Accompanying diseases** |
| --- | --- | --- | --- | --- |
| 1 | 25 | F | White matter hyperintensities | - |
| 2 | 1 | F | - | RTA |
| 3 | 2 | F | - | RTA |
| 4 | 4 | F | - | Microcephaly, ventricular septal defect, epilepsy, renal agenesis |
| 5 | 2 | M | - | Silver-Russel syndrome, microcephaly, epilepsy, inguinal hernia |
| 6 | 3 | F | - | Charge syndrome, left eye coloboma, cleft palate |
| 7 | 2 | F | - | Right eye primary hyperplastic vitreous, cleft palate |
| 8 | 1 | M | Arachnoid cyst in temporal lobe | - |
| 9 | 1 | F | - | Charge syndrome, esophageal atresia |
| 10 | 2 | M | Bilateral cortical atrophy of occipital lobes, white matter hyperintensities, enlargement of occipital horns of lateral ventricles (sequela of hypoglycemia), coarse calcifications in parietal white matter | Epilepsy, microcephaly, cerebral palsy |
| 11 | 1 | F | Thinning of the corpus callosum, white matter hyperintensities, bilateral enlargement of lateral ventricles, band heterotopia, bilateral lissencephaly, bilateral frontal and parietal polymicrogyria | Congenital CMV infection |
| 12 | 3 | F | - | Hirschprung disease, Waardenburg syndrome |
| 13 | 17 | M | Corpus callosum dysgenesis, falx cerebri agenesis, periventricular white matter hyperintensities | Cleft palate |
| 14 | 2 | M | - | Waardenburg syndrome |
| 15 | 4 | M | - | NMR |
| 16 | 3 | F | Arachnoid cyst in the left cerebellar hemisphere | NMR |
| 17 | 2 | M | Arachnoid cyst in the left temporal pole | - |
| 18 | 2 | M | Hydrocephalus, atrophy of corpus callosum, cerebellar vermis hypoplasia, hypomyelination | Tracheoesophageal fistula, patent ductus arteriosus |
| 19 | 4 | M | Arachnoid cyst in the right temporal pole | - |
